# Supplementary material for: Synaptotagmin 1 Suppresses Colorectal Cancer Metastasis by Inhibiting ERK/MAPK Signaling-Mediated Tumor Cell Pseudopodial Formation and Migration
Source: MDPI journal article supplement (doi:10.3390/cancers15215282), 2023-11-03
Supplement: s1 [file s1]

## Supplementary Information

Article

# Synaptotagmin 1 Suppresses Colorectal Cancer Metastasis by Inhibiting ERK/MAPK Signaling-Mediated Tumor Cell Pseudopodial Formation and Migration

Jian-Yun Shi <sup>1,†</sup>, Wen-Jing Li <sup>1,†</sup>, Zhen-Hua Jia <sup>1</sup>, Ying Peng <sup>1</sup>, Jia-Yi Hou <sup>2</sup>, Ning Li <sup>3</sup>, Rui-Juan Meng <sup>4</sup>, Wei Fu <sup>4</sup>, Yan-Lin Feng <sup>1</sup>, Li-Fei Wu <sup>1</sup>, Lan Zhou <sup>1</sup>, De-Ping Wang <sup>1</sup>, Jing Shen <sup>1</sup>, Jia-Song Chang <sup>1</sup>, Yan-Qiang Wang <sup>5,\*</sup> and Ji-Min Cao <sup>1,\*</sup>

<sup>1</sup> Key Laboratory of Cellular Physiology at Shanxi Medical University, Ministry of Education, and the Department of Physiology, Shanxi Medical University, Taiyuan 030606, China; shijianyun@sxmu.edu.cn (J.-Y.S.); liwenjing2@sxmu.edu.cn (W.-J.L.); jiazhenhua@sxmu.edu.cn (Z.-H.J.); pengying2@sxmu.edu.cn (Y.P.); feng@sxmu.edu.cn (Y.-L.F.); lifeiwu891002@sxmu.edu.cn (L.-F.W.); zhoulun@sxmu.edu.cn (L.Z.); wangdeping@sxmu.edu.cn (D.-P.W.); shenjing11@sxmu.edu.cn (J.S.); changjiasong@sxmu.edu.cn (J.-S.C.)

<sup>2</sup> Department of Clinical Laboratory, Shanxi Provincial Academy of Traditional Chinese Medicine, Taiyuan 030071, China; youhoujiayi0103@126.com

<sup>3</sup> Department of Gastrointestinal and Pancreatic Surgery & Hernia and Abdominal Surgery, Shanxi Provincial People's Hospital, Taiyuan 030045, China; lining205310@126.com

<sup>4</sup> Department of Radiology, The First Hospital of Shanxi Medical University, Shanxi Medical University, Taiyuan 030606, China; mrj0601@163.com (R.-J.M.); fuwei001@163.com (W.F.)

<sup>5</sup> Translational Medicine Research Center, Shanxi Medical University, Taiyuan 030606, China

\* Correspondence: yqwang15@sxmu.edu.cn (Y.-Q.W.); caojimin@sxmu.edu.cn (J.-M.C.)

† These authors contributed equally to this work.

**Table S1.** Results of Cox regression analysis.

| Characteristics    | Total(N) | Univariate analysis   |                  | Multivariate analysis |                  |
|--------------------|----------|-----------------------|------------------|-----------------------|------------------|
|                    |          | Hazard ratio (95% CI) | P value          | Hazard ratio (95% CI) | P value          |
| T stage            | 640      |                       |                  |                       |                  |
| T1&T2              | 131      | Reference             |                  |                       |                  |
| T3&T4              | 509      | 2.468 (1.327-4.589)   | <b>0.004</b>     | 1.926 (0.810-4.577)   | 0.138            |
| N stage            | 520      |                       |                  |                       |                  |
| N0                 | 367      | Reference             |                  |                       |                  |
| N1                 | 153      | 1.803 (1.149-2.829)   | <b>0.010</b>     | 0.768 (0.368-1.604)   | 0.482            |
| M stage            | 563      |                       |                  |                       |                  |
| M0                 | 474      | Reference             |                  |                       |                  |
| M1                 | 89       | 3.989 (2.684-5.929)   | <b>&lt;0.001</b> | 5.384 (2.477-11.699)  | <b>&lt;0.001</b> |
| Age                | 643      |                       |                  |                       |                  |
| ≤65                | 276      | Reference             |                  |                       |                  |
| >65                | 367      | 1.939 (1.320-2.849)   | <b>&lt;0.001</b> | 2.499 (1.355-4.607)   | <b>0.003</b>     |
| Gender             | 643      |                       |                  |                       |                  |
| Female             | 301      | Reference             |                  |                       |                  |
| Male               | 342      | 1.054 (0.744-1.491)   | 0.769            |                       |                  |
| Lymphatic invasion | 581      |                       |                  |                       |                  |
| No                 | 349      | Reference             |                  |                       |                  |
| Yes                | 232      | 2.144 (1.476-3.114)   | <b>&lt;0.001</b> | 1.763 (1.010-3.076)   | <b>0.046</b>     |
| SYT1               | 643      |                       |                  |                       |                  |
| Low                | 321      | Reference             |                  |                       |                  |
| High               | 322      | 1.487 (1.045-2.115)   | <b>0.027</b>     | 1.940 (1.112-3.384)   | <b>0.020</b>     |

**Table S2.** Sources of antibodies used in this study.

| Antibodies   | Manufacturer                 |
|--------------|------------------------------|
| SYT1         | CST, 14558S, Rabbit, USA     |
| GAPDH        | Beyotime, AF0006, Mouse, CHN |
| Beta-Tubulin | Affinity, T0023, Mouse, USA  |
| Slug         | CST, 9585T, Rabbit, USA      |
| Vimentin     | CST, 5741T, Rabbit, USA      |
| ERK1/2       | CST, 4695T, Rabbit, USA      |
| p-ERK1/2     | CST, 4370T, Rabbit, USA      |
| Ki67         | CST, 9449S, Mouse, USA       |
| PCNA         | CST, 2586T, Mouse, USA       |

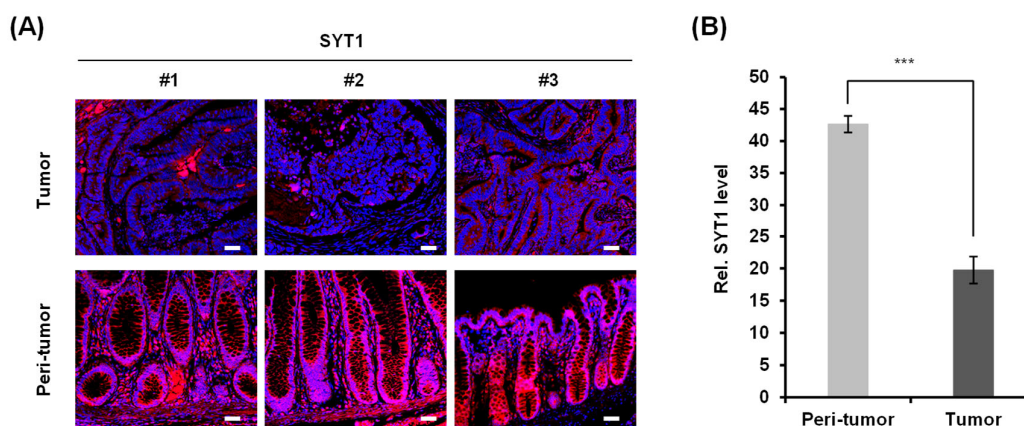

**Figure S1.** SYT1 suppressed the progression of CRC. (A) Three representative images of immunofluorescence analysis of SYT1 protein in three pairs of CRC tissues and peri-tumor. (B) Statistical analysis of all 15 pairs of samples was calculated. \*  $p < 0.05$ , \*\*  $p < 0.01$ , \*\*\*  $p < 0.001$ . Scale bar, 50  $\mu\text{m}$ .

Figure 1

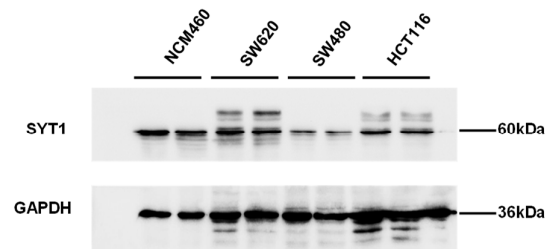

Figure 2

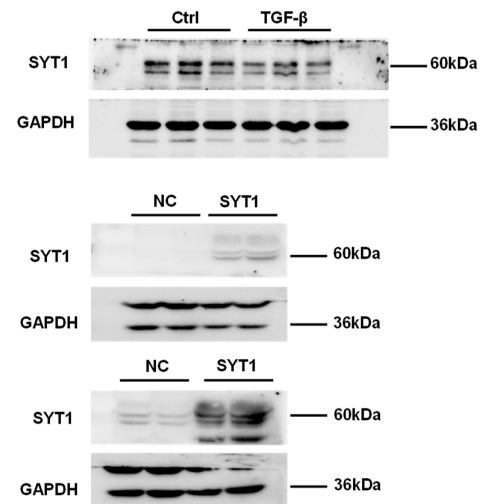

Figure 5

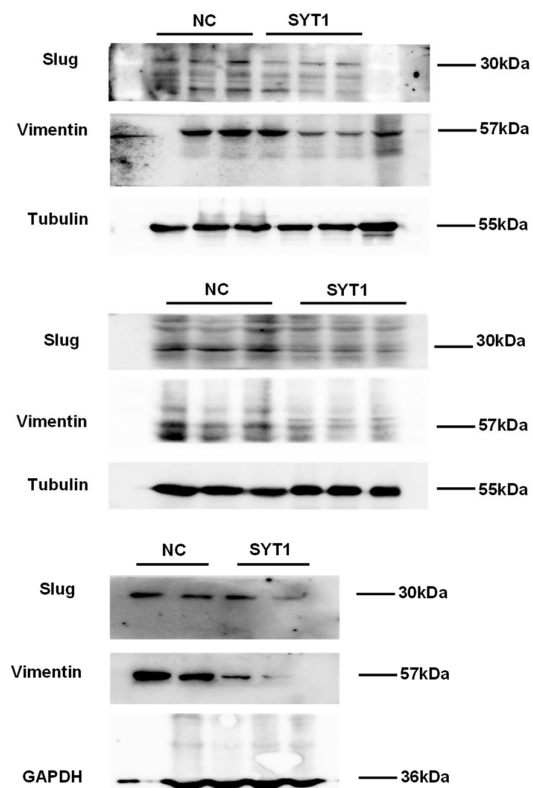

Figure 6

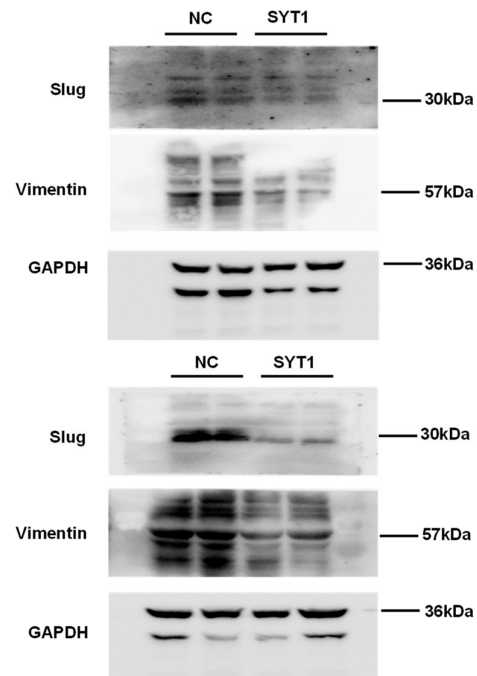

Figure 7

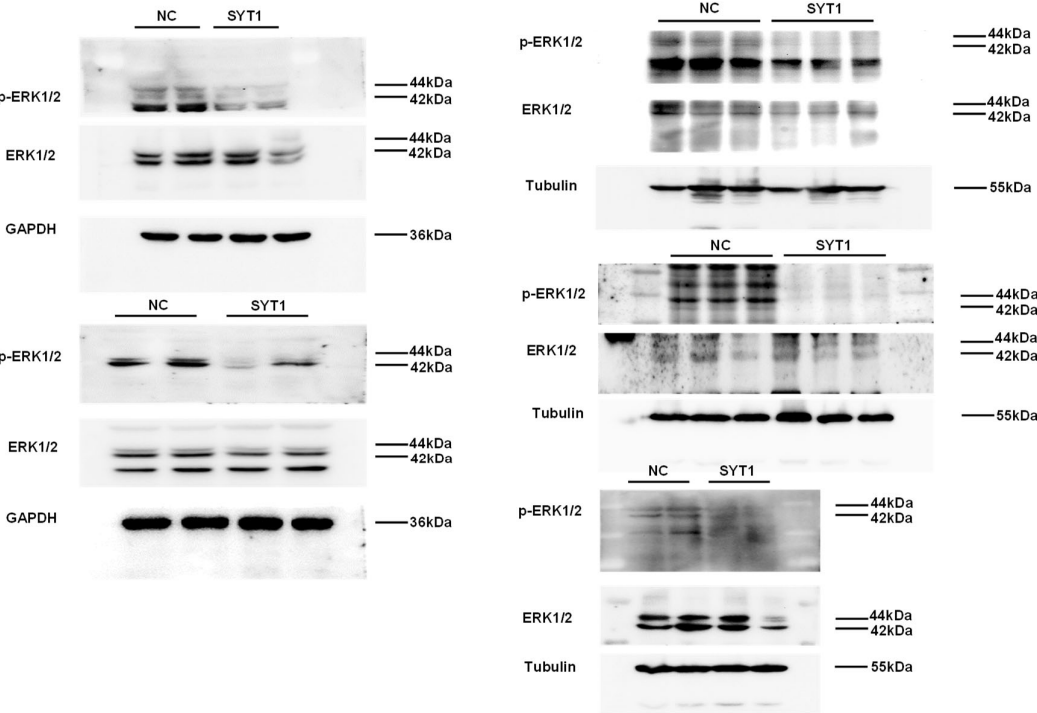

Figure 8

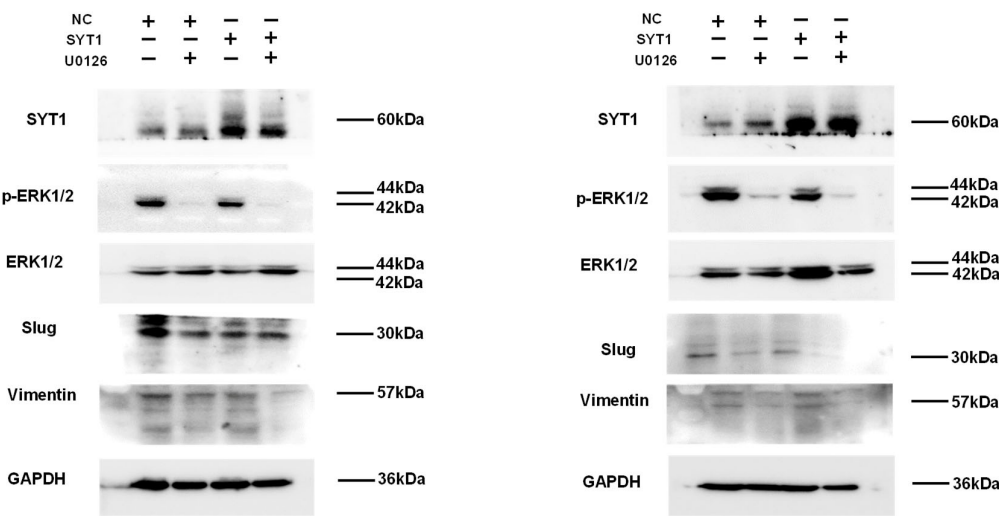

Figure S2. Original blots for Figures 1-8.
